# Supplementary material for: Comparison of Incidence and Prognosis of Myocardial Injury in Patients with COVID-19-Related Respiratory Failure and Other Pulmonary Infections: A Contemporary Cohort Study
Source: MDPI journal article supplement (doi:10.3390/jcm12196403), 2023-10-08
Supplement: s1 [file s1]

**Supplement Tables S1. Comparison of non-COVID-19 patients with versus without troponin checked**

| Features                               | Total             | No troponin<br>checked<br>n = 18 | Troponin<br>checked<br>n = 182 | P value |
|----------------------------------------|-------------------|----------------------------------|--------------------------------|---------|
| Demographics                           |                   |                                  |                                |         |
| Age (years)                            | 60.5 (42;72)      | 54.5 (29.8;65.5)                 | 62(44.8;73)                    | 0.070   |
| Gender                                 |                   |                                  |                                | 0.624   |
| Male                                   | 92 (46)           | 7 (38.9)                         | 85 (46.7)                      |         |
| Female                                 | 108 (54)          | 11 (61.1)                        | 97 (53.3)                      |         |
| Body Mass Index (kg/m <sup>2</sup> )   | 25.9 (21.6; 31.3) | 21.6(19.2;28.3)                  | 26.6(22.3;31.3)                | 0.022   |
| Comorbidities                          |                   |                                  |                                |         |
| Hypertension                           | 104 (52)          | 6 (33.3)                         | 98 (53.8)                      | 0.139   |
| Diabetes mellitus                      | 62 (31)           | 3 (16.7)                         | 59 (32.4)                      | 0.194   |
| Chronic kidney disease                 | 25 (12.5)         | 4 (22.2)                         | 21 (11.5)                      | 0.252   |
| Cerebrovascular disease                | 26 (13)           | 1 (5.6)                          | 25 (13.7)                      | 0.478   |
| Heart disease                          | 51 (25.5)         | 2 (11.1)                         | 49 (26.9)                      | 0.168   |
| Coronary artery disease                | 31 (15.5)         | 2 (11.1)                         | 29 (15.9)                      | 0.745   |
| Heart failure                          | 38 (19)           | 1 (5.6)                          | 37 (20.3)                      | 0.206   |
| Valvulopathy                           | 34 (17)           | 1 (5.6)                          | 33 (18.1)                      | 0.320   |
| COPD                                   | 53 (26.5)         | 4 (22.2)                         | 49 (26.9)                      | 0.785   |
| Smoking (present or past)              | 93 (46.5)         | 10 (55.6)                        | 83(45.6)                       | 0.465   |
| Malignancy                             | 26 (13)           | 5 (27.8)                         | 21 (11.5)                      | 0.065   |
| HIV                                    | 17 (8.5)          | 2(11.1)                          | 15 (8.2)                       | 0.655   |
| Laboratorial findings at ICU admission |                   |                                  |                                |         |
| P/F ratio                              | 206.7 (131;299)   | 234 (143;343)                    | 203 (131;293)                  | 0.350   |
| White blood cell count (103/ $\mu$ L)  | 12 (8.8;16)       | 11.5 (7.5; 17.6)                 | 12 (8.9;15.7)                  | 0.752   |
| Lactate (mmol/L)                       | 1.7 (1.2; 3.4)    | 1.5 (1.1; 4.5)                   | 1.8 (1.2; 3.2)                 | 0.703   |
| Creatinine (mg/dL)                     | 1.2 (0.8;2)       | 0.8 (0.6; 1.8)                   | 1.2 (0.8;2)                    | 0.082   |
| CRP (mg/L)                             | 109 (36;212)      | 111 (52;211)                     | 109 (35;213)                   | 0.894   |
| Outcome                                |                   |                                  |                                |         |
| Death                                  | 54 (27)           | 6 (33.3)                         | 48 (26.4)                      | 0.580   |
| Renal replacement therapy              | 22 (11)           | 1 (5.6)                          | 21 (11.5)                      | 0.699   |
| Length of mechanical ventilation       | 6 (4;10.8)        | 6 (6;6)                          | 6 (4; 11)                      | 0.929   |

Data expressed as median (p25;p75) or n (%).

**Supplement Tables S2. Comparison of COVID-19 patients with versus without troponin checked**

| Features                               | Total             | No troponin<br>checked<br>n = 165 | Troponin<br>checked<br>n = 1444 | P value |
|----------------------------------------|-------------------|-----------------------------------|---------------------------------|---------|
| Demographics                           |                   |                                   |                                 |         |
| Age (years)                            | 59 (46;68)        | 60 (47.5;68)                      | 58(46;68)                       | 0.346   |
| Gender                                 |                   |                                   |                                 | 0.741   |
| Male                                   | 891 (55.4)        | 89 (53.9)                         | 802 (55.5)                      |         |
| Female                                 | 718 (44.6)        | 76 (46.1)                         | 642 (44.5)                      |         |
| Body Mass Index (kg/m <sup>2</sup> )   | 30.4 (26.4; 35.6) | 29.1(25.2;34.4)                   | 30.4(26.5;35.7)                 | 0.051   |
| Comorbidities                          |                   |                                   |                                 |         |
| Hypertension                           | 910 (56.6)        | 89 (53.9)                         | 821 (56.9)                      | 0.507   |
| Diabetes mellitus                      | 554 (34.4)        | 60 (36.4)                         | 494 (34.2)                      | 0.604   |
| Chronic kidney disease                 | 127 (7.9)         | 18 (10.9)                         | 109 (7.5)                       | 0.129   |
| Cerebrovascular disease                | 85 (5.3)          | 7 (4.2)                           | 78 (5.4)                        | 0.712   |
| Heart disease                          | 215 (13.4)        | 22 (13.3)                         | 193 (13.4)                      | 1.000   |
| Coronary artery disease                | 142 (8.8)         | 16 (9.7)                          | 126 (8.7)                       | 0.664   |
| Heart failure                          | 162 (10.1)        | 15 (9.1)                          | 147 (10.2)                      | 0.785   |
| Valvulopathy                           | 86 (5.3)          | 6 (3.6)                           | 80 (5.5)                        | 0.364   |
| COPD                                   | 88 (5.5)          | 13 (7.9)                          | 75 (5.2)                        | 0.149   |
| Smoking (present or past)              | 356 (22.1)        | 42 (25.5)                         | 314 (21.7)                      | 0.277   |
| Malignancy                             | 94 (5.8)          | 7 (4.2)                           | 87 (6)                          | 0.482   |
| HIV                                    | 33 (2.1)          | 3(1.8)                            | 30 (2.1)                        | 1.000   |
| Laboratorial findings at ICU admission |                   |                                   |                                 |         |
| P/F ratio                              | 122 (86;194)      | 124 (84;191)                      | 122 (87;195)                    | 0.862   |
| White blood cell count (103/ $\mu$ L)  | 9.9 (7.3;13.7)    | 9.9 (7.2; 13.7)                   | 10 (7.3;13.7)                   | 0.523   |
| Lactate (mmol/L)                       | 1.5 (1.2; 2)      | 1.4 (1.1; 1.9)                    | 1.5 (1.2; 2.1)                  | 0.119   |
| Creatinine (mg/dL)                     | 1.0 (0.8;1.6)     | 0.9 (0.7; 1.6)                    | 1.0 (0.8;1.6)                   | 0.106   |
| CRP (mg/L)                             | 162 (97;242)      | 152 (83;238)                      | 163 (100;242)                   | 0.129   |
| Outcome                                |                   |                                   |                                 |         |
| Death                                  | 666 (41.4)        | 74 (44.8)                         | 592 (41)                        | 0.359   |
| Renal replacement therapy              | 372 (23.1)        | 33 (20)                           | 339 (23.5)                      | 0.332   |
| Length of mechanical ventilation       | 13 (7;24)         | 11 (7;23)                         | 13 (7; 24)                      | 0.617   |

Data expressed as median (p25;p75) or n (%).

**Supplement Tables S3. Characteristics of patients admitted to the ICU with respiratory failure attributed to COVID-19 or other pulmonary infections (sensitivity analysis including patients without troponin checked)**

| Features                                    | COVID-19<br>n = 1609 | Other<br>pulmonary<br>infections<br>n = 200 | P value |
|---------------------------------------------|----------------------|---------------------------------------------|---------|
| <b>Demographics</b>                         |                      |                                             |         |
| Age (years)                                 | 59 (46;68)           | 60.5 (42;72)                                | 0.315   |
| Gender                                      |                      |                                             | 0.013   |
| Male                                        | 891 (55.4)           | 92 (46)                                     |         |
| Female                                      | 718 (44.6)           | 108 (54)                                    |         |
| Body Mass Index (kg/m <sup>2</sup> )        | 30.4 (26.4;35.6)     | 25.9 (21.6;31.2)                            | <0.001  |
| <b>Comorbidities</b>                        |                      |                                             |         |
| Hypertension                                | 910 (56.6)           | 104 (52)                                    | 0.227   |
| Diabetes mellitus                           | 554 (34.4)           | 62 (31)                                     | 0.344   |
| Renal replacement therapy                   | 36 (2.2)             | 9 (4.5)                                     | 0.085   |
| Cerebrovascular disease                     | 85 (5.3)             | 26 (13)                                     | <0.001  |
| Heart disease                               | 215 (13.4)           | 51 (25.5)                                   | <0.001  |
| Coronary artery disease                     | 142 (8.8)            | 31 (15.5)                                   | 0.005   |
| Heart failure                               | 162 (10.1)           | 38 (19)                                     | <0.001  |
| Valvulopathy                                | 86 (5.3)             | 34 (17)                                     | <0.001  |
| COPD                                        | 88 (5.5)             | 53 (26.5)                                   | <0.001  |
| Smoking (present or past)                   | 356 (22.1)           | 93 (46.5)                                   | <0.001  |
| Malignancy                                  | 94 (5.8)             | 26 (13)                                     | <0.001  |
| HIV                                         | 33(2.1)              | 17 (8.5)                                    | <0.001  |
| <b>Laboratory findings at ICU admission</b> |                      |                                             |         |
| D-dimer (µg/mL)                             | 1.5 (0.8; 4.5)       | 2.4 (1; 5)                                  | 0.012   |
| White blood cell count (103/µL)             | 9.9 (7.3;13.7)       | 12 (8.8; 15.9)                              | <0.001  |
| Lactate (mmol/L)                            | 1.5 (1.2; 2)         | 1.7 (1.2; 3.4)                              | <0.001  |
| Prothrombin time (seconds)                  | 13.8 (13.1;14.9)     | 15 (13.8;16.7)                              | <0.001  |
| Creatinine (mg/dL)                          | 0.9 (0.8; 1.6)       | 1.2 (0.8;2)                                 | 0.045   |
| Fibrinogen (mg/L)                           | 648 (546;748)        | 541 (375;656)                               | <0.001  |
| CRP (mg/L)                                  | 162 (97;242)         | 109 (36;213)                                | <0.001  |
| <b>Clinical data at ICU admission</b>       |                      |                                             |         |
| SOFA score                                  | 4 (3;6)              | 5 (3;8)                                     | 0.039   |
| Ventilatory Support                         |                      |                                             | <0.001  |
| Non-invasive or HFNC                        | 402 (25)             | 21 (10.5)                                   |         |
| Invasive mechanical ventilation             | 534 (33.2)           | 83 (41.5)                                   |         |
| Vasopressor                                 | 357 (22.2)           | 75 (37.5)                                   | <0.001  |
| PaO <sub>2</sub> /FiO <sub>2</sub> ratio    | 122 (86;193)         | 206 (131;298)                               | 0.000   |
| <b>Outcomes</b>                             |                      |                                             |         |
| Renal replacement therapy (new)             | 372 (23.1)           | 22 (11)                                     | < 0.001 |
| Pulmonary embolism                          | 334 (20.8)           | 10 (5)                                      | <0.001  |
| Non survivor                                | 666 (41.4)           | 54 (27)                                     | <0.001  |
| Composite                                   | 930 (57.8)           | 72 (36)                                     | <0.001  |
| Length of hospital stay                     | 19 (11;31)           | 13 (9;22)                                   | <0.001  |
| Length of ICU stay                          | 10 (5;20)            | 4 (1;11)                                    | <0.001  |
| Length of mechanical ventilation            | 13 (7;24)            | 6 (4;10.8)                                  | < 0.001 |
